# Supplementary material
Source: Springer Nature journal article supplement (https://www.springermedizin.de/resource/supplementary/12935_2013_408_MOESM3_ESM.pdf/9540436)
Supplement: MOESM3 [file 9540436]

## MCF7 cell line

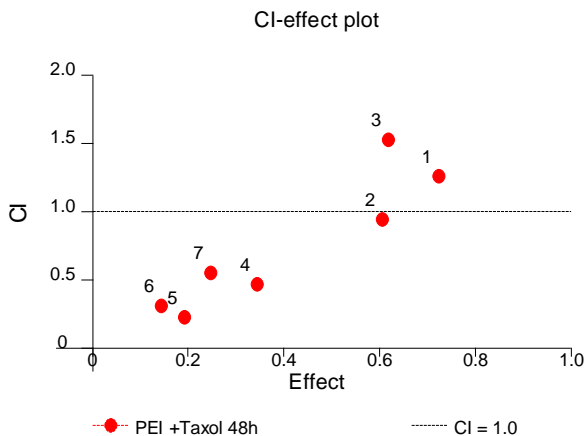

## CI For experimental values

| Group | PEI( $\mu$ M) | Taxol(nM) | Fa   | CI   |
|-------|---------------|-----------|------|------|
| 1     | 1             | 10        | 0.72 | 1.26 |
| 2     | 2.5           | 10        | 0.61 | 0.99 |
| 3     | 5             | 1         | 0.62 | 1.53 |
| 4     | 5             | 10        | 0.35 | 0.47 |
| 5     | 5             | 100       | 0.19 | 0.23 |
| 6     | 5             | 1000      | 0.15 | 0.31 |
| 7     | 10            | 10        | 0.25 | 0.51 |

## MDA-MB-231 cell line

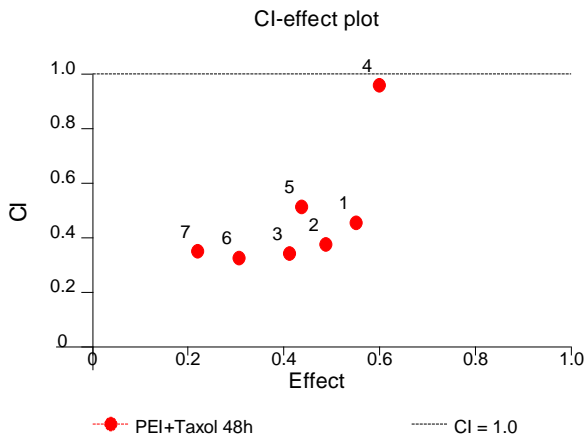

## CI For experimental values

| Group | PEI( $\mu$ M) | Taxol(nM) | Fa   | CI   |
|-------|---------------|-----------|------|------|
| 1     | 1             | 100       | 0.55 | 0.48 |
| 2     | 2.5           | 100       | 0.49 | 0.41 |
| 3     | 5             | 100       | 0.41 | 0.37 |
| 4     | 10            | 1         | 0.60 | 0.96 |
| 5     | 10            | 10        | 0.44 | 0.52 |
| 6     | 10            | 100       | 0.31 | 0.34 |
| 7     | 10            | 1000      | 0.22 | 0.38 |
